# Supplementary material for: RanBP2/Nup358 Mediates Sumoylation of STAT1 and Antagonizes Interferon-α-Mediated Antiviral Innate Immunity
Source: MDPI journal article supplement (doi:10.3390/ijms25010299), 2023-12-25
Supplement: s1 [file s1]

## Supporting Information

# RanBP2/Nup358 Mediates Sumoylation of STAT1 and Antagonizes Interferon- $\alpha$ -Mediated Antiviral Innate Immunity

Jiawei Li <sup>1,†</sup>, Lili Su <sup>1,†</sup>, Jing Jiang <sup>1</sup>, Yifan E. Wang <sup>2</sup>, Yingying Ling <sup>1</sup>, Yi Qiu <sup>2</sup>, Huahui Yu <sup>1</sup>, Yucong Huang <sup>1</sup>, Jiangmin Wu <sup>1</sup>, Shan Jiang <sup>1</sup>, Tao Zhang <sup>1</sup>, Alexander F. Palazzo <sup>2,\*</sup> and Qingtang Shen <sup>1,\*</sup>

<sup>1</sup> Department of Immunology, School of Basic Medical Sciences, Fujian Medical University, Fuzhou 350108, China; lijawei\_69@163.com (J.L.); su993753394@163.com (L.S.); jiangjing601210@163.com (J.J.); lyy1650820@outlook.com (Y.L.); yuhuahui@fjmu.edu.cn (H.Y.); ychuang2000@163.com (Y.H.); fjmu379664877@outlook.com (J.W.); zy-if-72900yq@outlook.com (S.J.); zjdrzht@fjmu.edu.cn (T.Z.)

<sup>2</sup> Department of Biochemistry, University of Toronto, Toronto, ON M5G 1M1, Canada; yifa.wang@mail.utoronto.ca (Y.E.W.); tina.qiu@mail.utoronto.ca (Y.Q.)

\* Correspondence: alex.palazzo@utoronto.ca (A.F.P.); qtshen1983@fjmu.edu.cn (Q.S.)

<sup>†</sup> These authors contributed equally to this work.

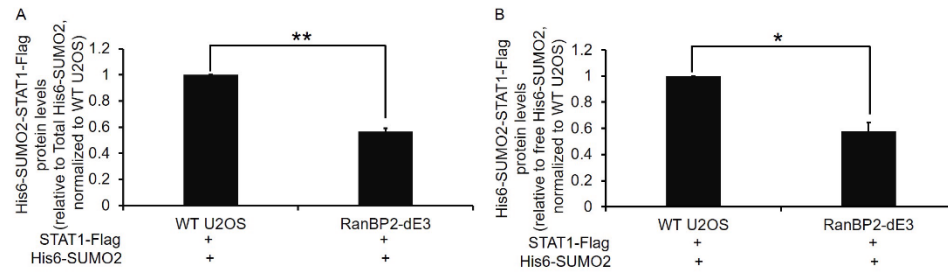

**Supplemental data, Figure S1. RanBP2 mediates STAT1 sumoylation in cells.** The isolated His6-SUMO2-STAT1-Flag, total His6-SUMO2 and free His6-SUMO2 protein levels were quantified using densitometry analysis and the ratio of His6-SUMO2-STAT1-Flag/ total His6-SUMO2 (A) or His6-SUMO2-STAT1-Flag/free His6-SUMO2 (B) was normalized to WT U2OS cells and plotted, with each bar representing the average of two independent experiments  $\pm$  SEM. \* $P$ <0.05, \*\* $P$ <0.01 (Student's  $t$ -test).

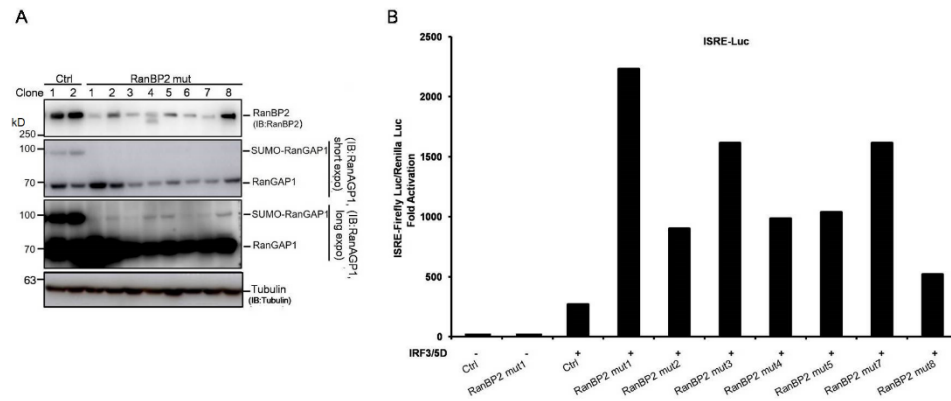

**Supplemental data, Figure S2. RanBP2-dependent sumoylation inhibits the type I interferon-mediated signaling pathway in multiple gene-edited cell lines.** (A) Immunoblotting analysis of RanBP2, RanGAP1, and Tubulin (loading control) in the whole-cell lysates of control (Ctrl1 and Ctrl2) and edited single cell clones (RanBP2 mut1-8) generated by CRISPR/Cas9. (B) Dual-Luciferase Reporter (DLR) analysis of the effect of RanBP2 on the activation of interferon-stimulated response elements (ISRE) promoter induced by IRF3/5D, the active form of IRF3, consisting of 5-amino-acid residues mutation in the C-terminal domain of IRF3 which leads to its nuclear translocation and activates IFN- $\beta$  promoter directly. Firefly and Renilla luciferase luminescence were measured and the ratio was normalized to the Ctrl cell line without IRF3/5D stimulation.



the green box. The polar contacts between RanBP2 IR1 domain and Ubc9 are indicated in yellow dashed lines. The structure is adapted from Gareau et al. [2].

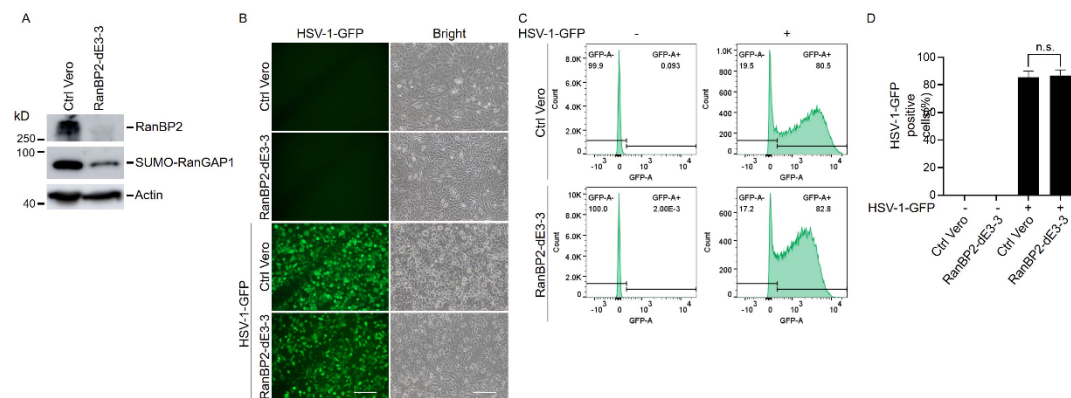

**Supplemental data, Figure S4. Effect of RanBP2 mutant on viral infection in Vero cell lines.** (A) Western blotting analysis of RanBP2, SUMO-RanGAP1 and Actin (loading control) in the whole-cell lysates of control (Ctrl Vero) and edited Vero cells by CRISPR/Cas9 system (RanBP2-dE3-3). (B) Ctrl Vero and RanBP2-dE3-3 cells were infected with HSV-1-GFP at an MOI of 0.5 for 8 h. The infected cells were observed for GFP expression as an indication of HSV-1 infection. Viral infection was analyzed by fluorescence microscopy (B) and flow cytometry (C-D). Representative images of virus infected (GFP-positive) cells were obtained by epifluorescence microscopy. Scale bar =400  $\mu$ m (B). The percentage of virus infected (GFP-positive) cells in (B) were quantitated by flow cytometry (C) and plotted (D) with each bar representing the average of three independent experiments  $\pm$  SEM. n.s. indicates no significant difference (Student's t-test).

## References

1. Pichler, A.; Gast, A.; Seeler, J.S.; Dejean, A.; Melchior, F. The Nucleoporin RanBP2 Has SUMO1 E3 Ligase Activity. *Cell* **2002**, *108*, 109–120, doi:10.1016/S0092-8674(01)00633-X.
2. Gareau, J.R.; Reverter, D.; Lima, C.D. Determinants of Small Ubiquitin-like Modifier 1 (SUMO1) Protein Specificity, E3 Ligase, and SUMO-RanGAP1 Binding Activities of Nucleoporin RanBP2. *Journal of Biological Chemistry* **2012**, *287*, 4740–4751, doi:10.1074/jbc.M111.321141.
